# Supplementary material
Source: PubMed Central journal article supplement (PMC3442584)
Supplement: supp_tpc.112.097519_tpc097519Supplemental.pdf [file supp_tpc.112.097519_tpc097519Supplemental.pdf]

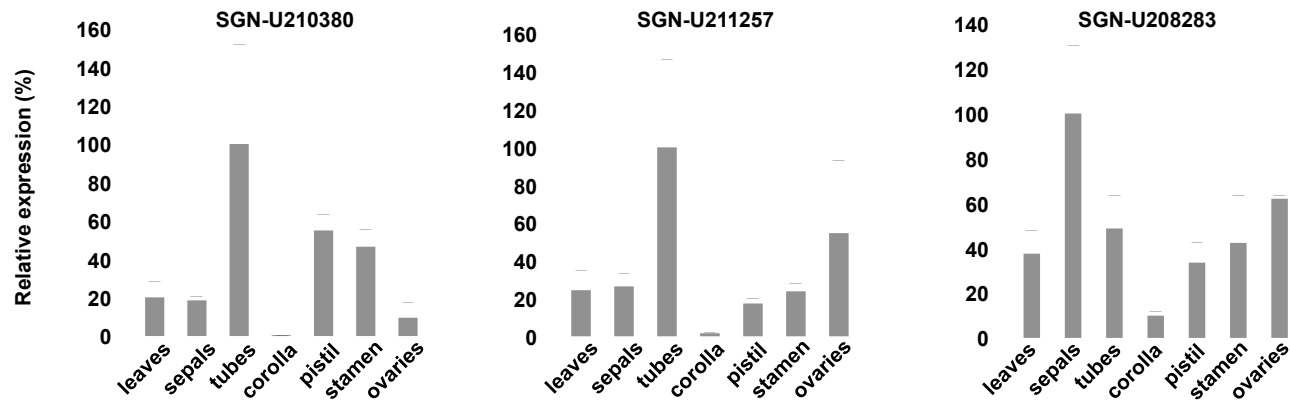

**Supplemental Figure 1.** Tissue-specific Expression Profiles of Putative 4CL Candidates.

*SGN-U210380*; *SGN-U211257*; *SGN-U208283* transcript levels were determined by qRT-PCR relative to the reference gene (*elongation factor 1-alpha*), in leaves and floral tissues harvested on day 2 postanthesis at 3 PM. Data are means  $\pm$  SE ( $n = 3$  biological replicates). Tissue-specific expression of *SGN-U210380*; *SGN-U211257* and *SGN-U208283* is shown relative to the tissue with the highest transcript level.

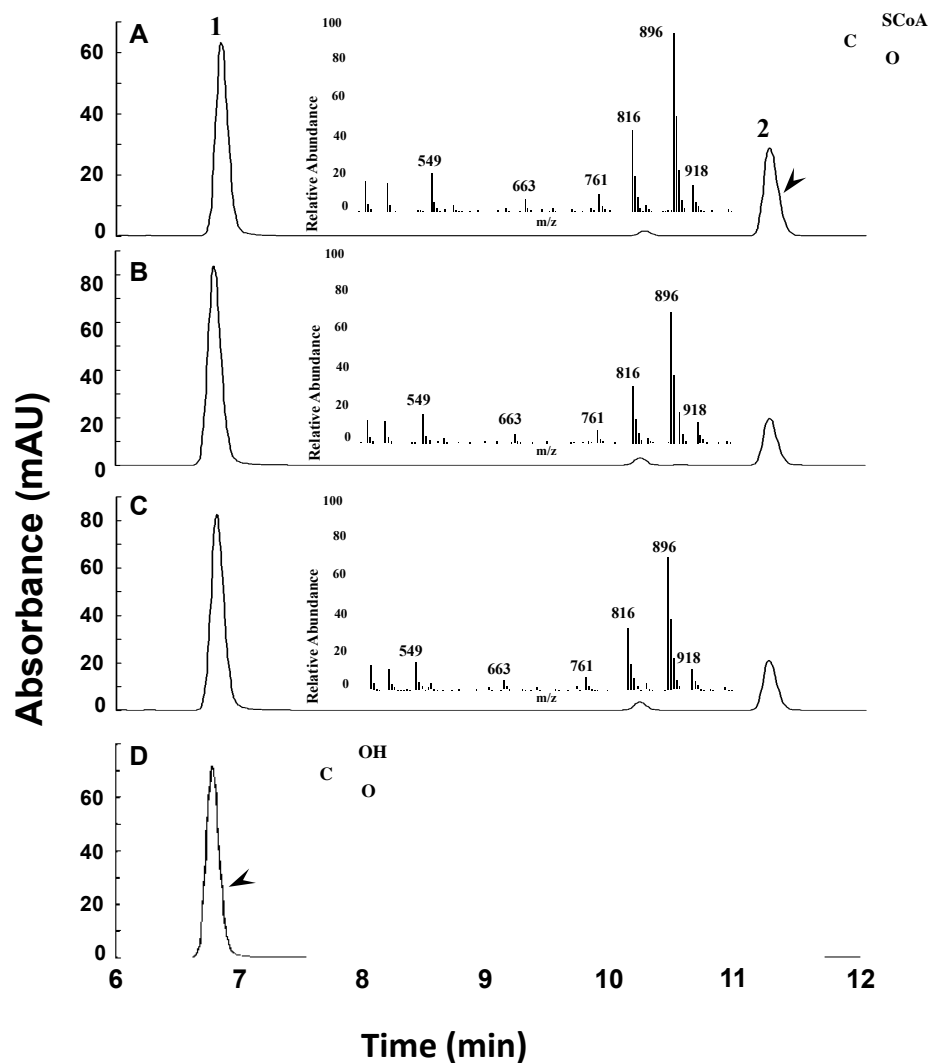

**Supplemental Figure 2.** LC-MS Analysis of Product Formed by Recombinant Ph-CNL and Ph-4CL1 from *trans*-Cinnamic Acid.

(A) Reaction catalyzed by Ph-CNL

(B) Reaction catalyzed by Ph-4CL1.

(C) Reaction catalyzed by *Nicotiana tobacco* 4CL used for formation of cinnamoyl-CoA standard.

(D) Reaction catalyzed by boiled Ph-CNL.

1, *trans*-cinnamic acid; 2, cinnamoyl-CoA. Inserts with numbered peaks in A-C represent mass spectra of cinnamoyl-CoA. Retention time and mass spectra of Ph-CNL and Ph-4CL1 produced cinnamoyl-CoA are identical to those formed by *N. tobacco* 4CL. m/z, mass-to-charge ratio.

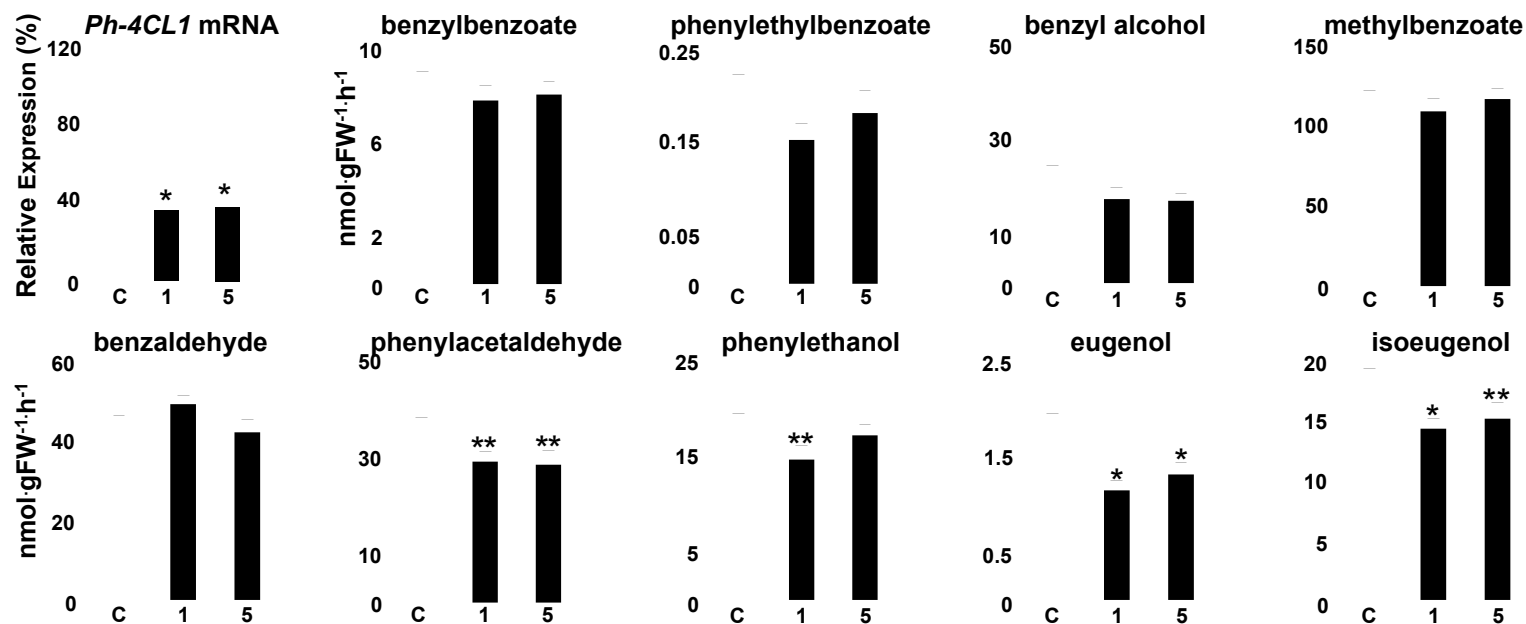

**Supplemental Figure 3.** Effect of *Ph-4CL1*-RNAi Suppression on *Ph-4CL1* Expression and Emission of Benzenoid/Phenylpropanoid Compounds in Corollas of Petunia Flowers.

*Ph-4CL1* mRNA levels were determined by qRT-PCR in corollas of control (C, white bars) and two independent *Ph-4CL1* RNAi lines (1 and 5, black bars) harvested at 3 PM, 2 d postanthesis (upper left corner panel). Expression values for transgenic lines are shown as percentage of *Ph-4CL1* expression in control petals which is set at 100%. Data are means  $\pm$  SE ( $n = 3$  biological replicates).

Scent collections were performed from detached flowers 2 d postanthesis for 12 h starting at 8 PM. Emission rates are expressed on a per hour basis assuming a constant emission rate over the 12-h period. Data are means  $\pm$  SE ( $n \geq 7$  biological replicates). \*  $P < 0.01$ , \*\*  $P < 0.05$  by Student's *t* test of transgenics relative to control.

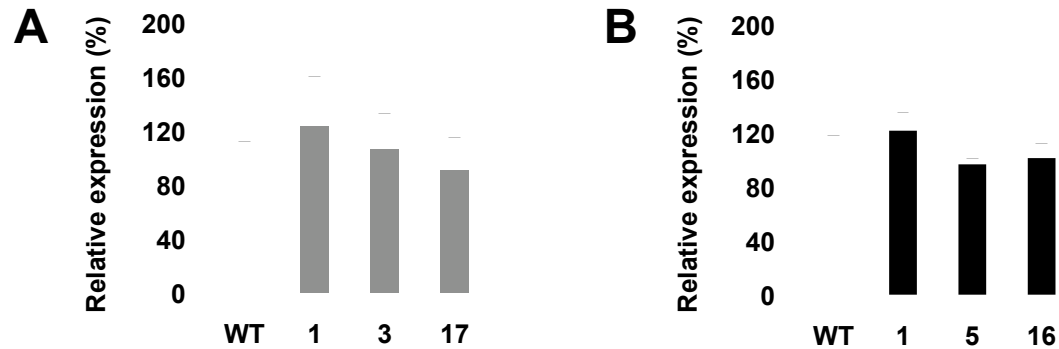

**Supplemental Figure 4.** Expression of *Ph-4CL1* and *Ph-CNL* in *Ph-CNL*-RNAi and *Ph-4CL1*-RNAi Lines, Respectively.

*Ph-4CL1* transcript levels in *Ph-CNL*-RNAi lines (A) and *Ph-CNL* mRNA expression in *Ph-4CL1*-RNAi lines (B) were determined by qRT-PCR. Data are means  $\pm$  SE ( $n = 3$  biological replicates). Expressions of *Ph-CNL* and *Ph-4CL1* are shown relative to the corresponding transcript levels in corollas of wild type flowers collected on day 2 postanthesis at 3 PM.

**Supplemental Table 1.** Accession Numbers of Protein Sequences Used for Phylogenetic Analysis in Figure 3.

| Clade | Protein          | Accession Number | Database  |
|-------|------------------|------------------|-----------|
| I     | At2g47240 LACS1  | NP_182246.1      | NCBI      |
| I     | At1g49430 LACS2  | NP_175368.2      | NCBI      |
| I     | At1g64400 LACS3  | NP_176622.1      | NCBI      |
| I     | At4g23850 LACS4  | NP_194116.1      | NCBI      |
| I     | At4g11030 LACS5  | NP_192841.1      | NCBI      |
| I     | At3g05970 LACS6  | NP_566265.1      | NCBI      |
| I     | At5g27600 LACS7  | NP_198112.2      | NCBI      |
| I     | At2g04350 LACS8  | NP_178516.1      | NCBI      |
| I     | At1g77590 LACS9  | NP_177882.1      | NCBI      |
| I     | At4g14070 AAE15  | NP_193143.2      | NCBI      |
| I     | At3g23790 AAE16  | NP_189021.2      | NCBI      |
| II    | At5g23050 AAE17  | NP_197696.2      | NCBI      |
| II    | At1g55320 AAE18  | NP_175929.3      | NCBI      |
| II    | At5g36880 ACS    | NP_198504.1      | NCBI      |
| III   | At4g03400        | NP_192249.1      | NCBI      |
| III   | At2g46370 JAR1   | NP_566071.1      | NCBI      |
| III   | At5g13370        | NP_196841.2      | NCBI      |
| III   | At5g13360        | NP_196840.1      | NCBI      |
| III   | At5g13350        | NP_196839.1      | NCBI      |
| III   | At5g13380        | NP_196842.2      | NCBI      |
| III   | At5g54510 GH3.6  | NP_200262.1      | NCBI      |
| III   | At4g27260 GH3.5  | NP_194456.1      | NCBI      |
| III   | At4g37390 GH3.2  | NP_195455.1      | NCBI      |
| III   | At1g59500 GH3.4  | NP_176159.1      | NCBI      |
| III   | At2g23170 GH3.3  | NP_179898.1      | NCBI      |
| III   | At2g14960        | NP_179101.1      | NCBI      |
| III   | At2g47750 GH3.9  | NP_182296.1      | NCBI      |
| III   | At1g28130 GH3.17 | NP_174134.1      | NCBI      |
| III   | At1g48670        | NP_175300.1      | NCBI      |
| III   | At1g48660        | NP_175299.1      | NCBI      |
| III   | At5g51470        | NP_199960.1      | NCBI      |
| III   | At1g23160        | NP_173729.1      | NCBI      |
| III   | At5g13320 PBS3   | NP_196836.1      | NCBI      |
| IV    | At1g62940 ACOS5  | NP_176482.1      | NCBI      |
| IV    | Pp1s96_224       | Pp1s96_224V6.1   | Phytozome |
| IV    | Pp1s325_20       | Pp1s325_20V6.1   | Phytozome |
| IV    | At1g65060 At4CL3 | NP_176686.1      | NCBI      |
| IV    | At3g21230 At4CL4 | NP_188760.3      | NCBI      |
| IV    | At1g51680 At4CL1 | NP_001077697.1   | NCBI      |

| Clade | Protein              | Accession Number   | Database  |
|-------|----------------------|--------------------|-----------|
| IV    | At3g21240 At4CL2     | NP_188761.1        | NCBI      |
| IV    | Ph 4CL1              | JN120849           | NCBI      |
| IV    | Os 4CL3 Os02g0177600 | NP_001046069.1     | NCBI      |
| IV    | Os 4CL4 Os06g0656500 | NP_001058252.1     | NCBI      |
| IV    | Os 4CL5 Os08g0448000 | NP_001061935.1     | NCBI      |
| IV    | Os 4CL2 Os02g0697400 | NP_001047819.1     | NCBI      |
| IV    | Os 4CL1 Os08g0245200 | NP_001061353.1     | NCBI      |
| IV    | Pt6s18490            | POPTR_0006s18490.1 | Phytozome |
| IV    | Pt6s18510            | POPTR_0006s18510.1 | Phytozome |
| IV    | Pt18s10210           | POPTR_0018s10210.1 | Phytozome |
| IV    | Pt3s18720            | POPTR_0003s18720.1 | Phytozome |
| IV    | Pt19s07600           | POPTR_0019s07600.1 | Phytozome |
| IV    | Pt1s07400            | POPTR_0001s07400.1 | Phytozome |
| IV    | Zm 4CL               | NP_001105258.1     | NCBI      |
| IV    | Sb 4CL1              | XP_002452704.1     | NCBI      |
| IV    | Sb 4CL2              | XP_002451647.1     | NCBI      |
| IV    | Gm 4CL1              | NP_001237750.1     | NCBI      |
| IV    | Gm 4CL2              | P31687.2           | NCBI      |
| IV    | Gm 4CL3              | NP_001237270.1     | NCBI      |
| IV    | Ps 4CL1              | ABR17998.1         | NCBI      |
| IV    | Pp1s185_66           | Pp1s185_66V6.1     | Phytozome |
| IV    | Pp1s20_346           | Pp1s20_346V6.1     | Phytozome |
| IV    | Pp1s71_170           | Pp1s71_170V6.1     | Phytozome |
| IV    | Pp1s167_96           | Pp1s167_96V6.1     | Phytozome |
| IV    | Nt 4CL1              | O24145.1           | NCBI      |
| IV    | Nt 4CL2              | O24146.1           | NCBI      |
| IV    | Ri 4CL2              | AAF91309.1         | NCBI      |
| V     | At4g05160            | NP_192425.1        | NCBI      |
| V     | At1g20500            | NP_173474.5        | NCBI      |
| V     | At1g20490            | NP_173473.2        | NCBI      |
| V     | At5g38120            | NP_198628.2        | NCBI      |
| V     | At1g20510 OPCL1      | NP_564115.1        | NCBI      |
| V     | At1g20480            | NP_173472.1        | NCBI      |
| V     | At5g63380            | NP_201143.1        | NCBI      |
| V     | At4g19010            | NP_193636.1        | NCBI      |
| VI    | At1g21530 AAE10      | NP_001077573.1     | NCBI      |
| VI    | At1g21540 AAE9       | NP_173573.1        | NCBI      |
| VI    | At1g77240 AAE4       | NP_177848.1        | NCBI      |
| VI    | At5g16370 AAE5       | NP_197141.1        | NCBI      |
| VI    | At5g16340 AAE6       | NP_197138.1        | NCBI      |
| VI    | At1g75960 AAE8       | NP_177724.1        | NCBI      |
| VI    | At3g16910 AAE7/ACN1  | NP_188316.1        | NCBI      |

| Clade | Protein              | Accession Number   | Database  |
|-------|----------------------|--------------------|-----------|
| VI    | Ps ACN1              | ABK25037.1         | NCBI      |
| VI    | Pp1s220_60           | Pp1s220_60V6.1     | Phytozome |
| VI    | At2g17650 AAE2       | NP_179356.1        | NCBI      |
| VI    | At1g20560 AAE1       | NP_564116.1        | NCBI      |
| VI    | Pp1s7_313            | Pp1s7_313V6.1      | Phytozome |
| VI    | At1g76290            | NP_177756.1        | NCBI      |
| VI    | Pt16s03410           | POPTR_0016s03410.1 | Phytozome |
| VI    | Pt4s08030            | POPTR_0004s08030.1 | Phytozome |
| VI    | Pt6s03470            | POPTR_0006s03470.1 | Phytozome |
| VI    | Pt6s03460            | POPTR_0006s03460.1 | Phytozome |
| VI    | Pt17s02150           | POPTR_0017s02150.1 | Phytozome |
| VI    | Pt17s02130           | POPTR_0017s02130.1 | Phytozome |
| VI    | Gm CNL2              | XP_003538370.1     | NCBI      |
| VI    | Gm CNL3              | XP_003552891.1     | NCBI      |
| VI    | Gm CNL1              | XP_003544957.1     | NCBI      |
| VI    | Gm CNL4              | XP_003518359.1     | NCBI      |
| VI    | Ph CNL               | JN120848           | NCBI      |
| VI    | Cb BZL               | JN135247           | NCBI      |
| VI    | At1g65880 BZO1       | NP_176763.1        | NCBI      |
| VI    | At1g65890 AAE12      | NP_176764.1        | NCBI      |
| VI    | At1g68270            | NP_176994.1        | NCBI      |
| VI    | At1g66120 AAE11      | NP_176786.1        | NCBI      |
| VI    | Zm CNL               | NP_001147787.1     | NCBI      |
| VI    | Sb CNL               | XP_002468582.1     | NCBI      |
| VI    | Os CNL2 Os03g0130100 | NP_001048852.1     | NCBI      |
| VI    | Os CNL1 Os09g0555800 | NP_001063895.1     | NCBI      |
| VII   | At3g48990 AAE3       | NP_190468.1        | NCBI      |
| VII   | At3g16170 AAE13      | NP_566537.1        | NCBI      |
| VII   | At1g30520 AAE14      | NP_174340.2        | NCBI      |

**Supplemental Table 2.** Activities of enzymes involved in benzenoid biosynthesis in petunia petals of control and *PhCNL*-RNAi Lines

|       | RNAi- <i>CNL</i> lines |                 |                |                  |
|-------|------------------------|-----------------|----------------|------------------|
|       | Control                | 1               | 3              | 17               |
| PAL   | 150.454 ± 17.793       | 158.15 ± 10.499 | 147.13 ± 20.86 | 142.847 ± 21.218 |
| BALDH | 26.165 ± 2.4           | 26.477 ± 1.098  | 26.449 ± 0.718 | 30.155 ± 2.054   |
| IGS   | 0.064 ± 0.003          | 0.08 ± 0.01     | 0.087 ± 0.005  | 0.076 ± 0.007    |
| EGS   | 0.241 ± 0.023          | 0.268 ± 0.028   | 0.282 ± 0.017  | 0.31 ± 0.017     |
| BSMT  | 4.284 ± 0.134          | 4.856 ± 0.361   | 4.873 ± 0.244  | 4.962 ± 0.3      |
| BPBT  | 3.859 ± 0.183          | 3.332 ± 0.206   | 3.258 ± 0.3    | 2.44 ± 0.429     |
| PAAS  | 0.021 ± 0.005          | 0.016 ± 0.002   | 0.02 ± 0.006   | 0.018 ± 0.004    |
| 4CL1  | 45.485 ± 3.056         | 59.564 ± 7.907  | 46.053 ± 8.173 | 57.419 ± 12.955  |

Petal crude extracts were prepared from day 2 flowers postanthesis collected at 8 PM. Data are means ± SE (n =3 to 6 biological replicates) and expressed in pkat/mg protein. Activities were not significantly different between genotypes (P > 0.05 by Student's t test). BALDH, benzaldehyde dehydrogenase; BPBT, benzoyl-CoA:benzyl alcohol/phenylethanol benzoyltransferase; BSMT, S-adenosyl-L-Met:benzoic/salicylic acid carboxyl methyltransferase; 4CL1, 4-coumarate:CoA ligase; EGS, eugenol synthase; IGS, isoeugenol synthase; PAAS, phenylacetaldehyde synthase; PAL, phenylalanine ammonia lyase



**Supplemental Table 3. Subcellular fractionation of petunia petal crude extracts.** Activities of marker enzymes, Ph-4CL1 and Ph-CNL.

| Marker                             | Crude extract                   | Cytosolic fraction                           | Peroxisomal fraction            |
|------------------------------------|---------------------------------|----------------------------------------------|---------------------------------|
| Catalase <sup>1</sup>              | 57.9 ± 1.9<br>(100% of total)   | 15.0 ± 9.0<br>(26.0% of total)               | 457.5 ± 53.5<br>(1.6% of total) |
| Fumarase <sup>1</sup>              | 342.1 ± 33.8<br>(100% of total) | 155.4 ± 7.1<br>(50.4% of total)              | 261.5 ± 53.3<br>(0.2% of total) |
| Alcohol dehydrogenase <sup>2</sup> | 125.4 ± 13.3<br>(100% of total) | 309.6 ± 64.7<br>(86.9% of total)             | n.d.                            |
| Chlorophyll <sup>3</sup>           | 0.158 ± 0.004                   | < 0.01                                       | < 0.01                          |
| 4CL <sup>2*</sup>                  | 20.0 ± 4.8<br>(100% of total)   | 30.4 ± 2.4<br>(152.0% of total)              | n.d.                            |
| CNL <sup>2**</sup>                 | 9.9 ± 0.3<br>(100% of total)    | 7.6 ± 0.1 <sup>***</sup><br>(76.8% of total) | 82.8 ± 7.3<br>(2.4% of total)   |

<sup>1</sup>Specific activity in nkat mg<sup>-1</sup>

<sup>2</sup>Specific activity in pkat mg<sup>-1</sup>

<sup>3</sup>Units are ng x gFW<sup>-1</sup>

\*Activity toward ferulic acid

\*\*Activity toward cinnamic acid

n.d. - not detected

\*\*\*Note that Ph-4CL1 contributes to cytosolic cinnamate CoA ligase activity

**Supplemental Table 4.** Substrate specificity of PhCNL with short, medium and long chain fatty acids

| <b>substrate</b>            | <b>%</b> |
|-----------------------------|----------|
| <i>trans</i> -cinnamic acid | 100      |
| <i>p</i> -coumaric acid     | 76       |
| octanoic acid               | n.d      |
| hexanoic acid               | n.d.     |
| butyric acid                | n.d.     |
| propanoic acid              | n.d.     |
| myristic acid               | n.d.     |
| palmitic acid               | n.d.     |

Acyl Coa synthetase activity of the affinity purified recombinant Ph-CNL was determined by a coupled assay with myokinase, pyruvate kinase and lactate dehydrogenase measuring AMP formation. Values represent relative AMP formation by monitoring NADH oxidation ( $A_{340nm}$ ), normalized to the reaction containing Ph-CNL and *trans*-cinnamic acid, the preferred substrate for this enzyme, which was set as 100% ( $29.19 \pm 11$  nkat  $mg^{-1}$  protein,  $n = 3$ ). As positive control for fatty acids, petunia petal crude extract was analyzed for acyl CoA synthetase activity toward hexanoic acid which was  $58.1 \pm 3.8$  nkat  $mg^{-1}$  protein ( $n = 3$ ).

n.d., not detected, activity below detection level.
